# Supplementary material for: Evaporation abrupt changes in the Qinghai-Tibet Plateau during the last half-century
Source: PubMed Central journal article supplement (PMC6934787; doi:10.1038/s41598-019-56464-1), 2019-12-27
Supplement: 41598_2019_56464_MOESM1_ESM.pdf [file 41598_2019_56464_MOESM1_ESM.pdf]

# **Evaporation abrupt changes in the Qinghai-Tibet Plateau during the last half-century**

Tianci Yao<sup>1,2</sup>, Hongwei Lu<sup>1\*</sup>, Wei Feng<sup>1,2</sup>, Qing Yu<sup>1,2</sup>

*<sup>1</sup>Key Laboratory of Water Cycle and Related Land Surface Processes, Institute of Geographic Sciences and Natural Resources Research, Chinese Academy of Sciences, Beijing 100101, China*

*<sup>2</sup>University of Chinese Academy of Sciences, Beijing 100049, China*

\*Correspondence and requests for materials should be addressed to H.L. (email: [luhw@igsnr.ac.cn](mailto:luhw@igsnr.ac.cn))

## Supplementary Information Text

### Evaluation of $E_{\text{pan}}$ simulation

Several evaluation metrics, including the linear regression equation and its determination coefficient ( $R^2$ ), root mean square error (RMSE) as well as the difference of mean monthly values (MD) between the simulated ( $E_{\text{pan\_simu}}$ ) and observed  $E_{\text{pan}}$  ( $E_{\text{pan\_obs}}$ ), were calculated to assess the performance of PenPan model at a monthly time scale (Supplementary Fig. S1 and Table S2). Generally, the agreement between  $E_{\text{pan\_simu}}$  and  $E_{\text{pan\_obs}}$  was satisfactory. As shown in Supplementary Fig. S1, the regression slope between  $E_{\text{pan\_simu}}$  and  $E_{\text{pan\_obs}}$  of all stations was 0.96, and the corresponding  $R^2$ , RMSE and MD were 0.96, 16.94 mm and 0.00 mm, respectively. The average value of regression slopes at different stations was  $0.92 \pm 0.05$  (mean  $\pm$  1 s.d.), and the corresponding average values of  $R^2$  and RMSE were  $0.96 \pm 0.03$  and  $(15.92 \pm 5.11)$  mm, respectively (Supplementary Table S2). Additionally, a negligible MD between  $E_{\text{pan\_simu}}$  and  $E_{\text{pan\_obs}}$  presented at 274 stations. These metrics indicated that PenPan model was applicable to estimate monthly  $E_{\text{pan}}$  in the highlands at both site and regional scales.

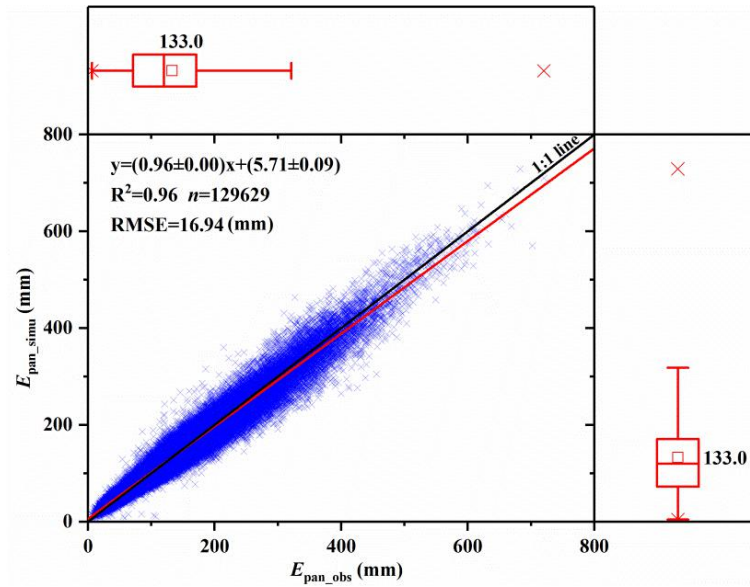

Figure S1. Comparison of simulated and observed monthly  $E_{pan}$ . Boxplots showed minima (cross), 25th percentile, median (solid line), average (square), 75th percentile and maxima (cross). The figure was generated by origin 9.0, URL: <https://www.originlab.com/>.

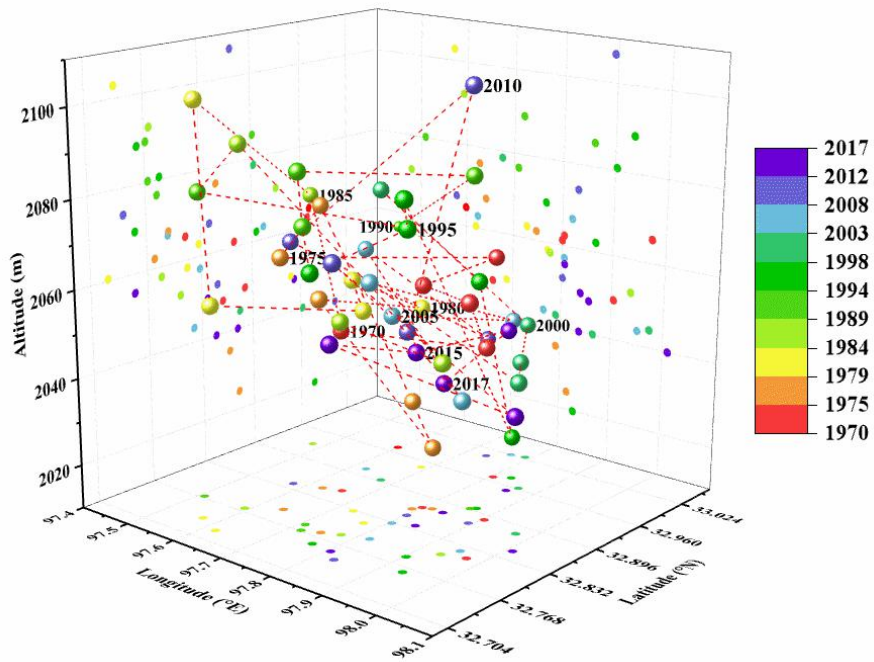

Figure S2. Movement trajectory of regional gravity center of annual  $E_{pan}$  during 1970-2017.

The figure was generated by origin 9.0, URL: <https://www.originlab.com/>.

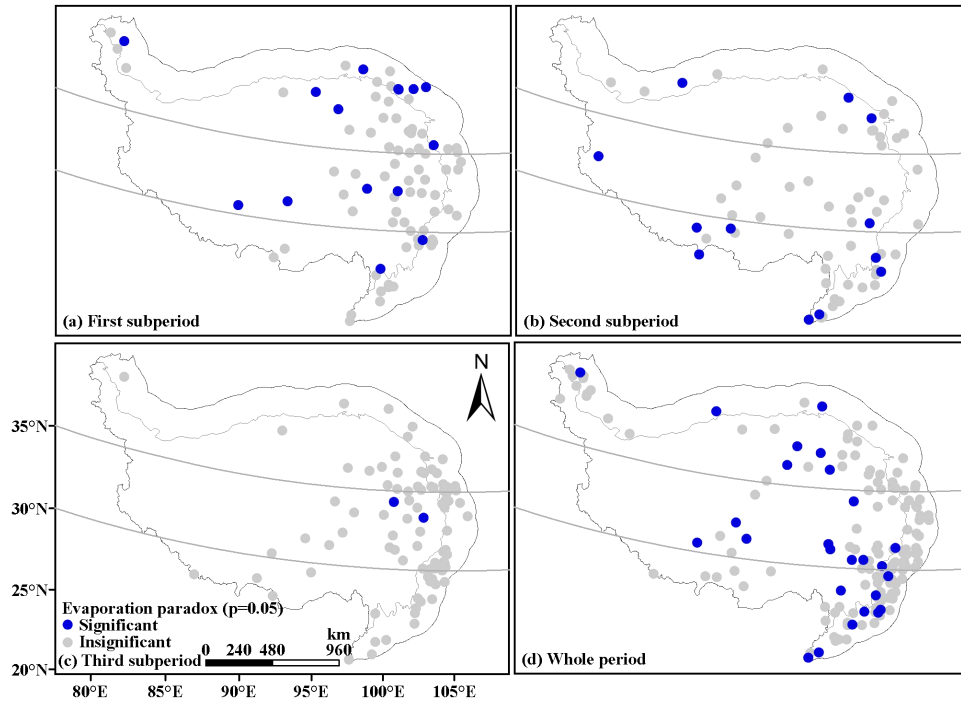

Figure S3. Spatial distributions of pan evaporation paradox in the whole and three-segmented periods. The maps were generated in ArcMap 10.2, URL: <http://www.esrichina-bj.cn/softwareproduct/ArcGIS/>.

Table S1. Basic information about 274 stations.

| WMO ID | Latitude (°N) | Longitude (°E) | Altitude (m) | WMO ID | Latitude (°N) | Longitude (°E) | Altitude (m) |
|--------|---------------|----------------|--------------|--------|---------------|----------------|--------------|
| 51804  | 37.46         | 75.14          | 3090.1       | 52652  | 39.05         | 100.17         | 1461.1       |
| 51886  | 38.15         | 90.51          | 2944.8       | 52661  | 38.48         | 101.05         | 1765.5       |
| 52533  | 39.46         | 98.29          | 1477.2       | 52674  | 38.13         | 101.56         | 2093.9       |
| 52602  | 38.45         | 93.20          | 2770.0       | 52681  | 38.38         | 103.05         | 1367.5       |
| 52633  | 38.49         | 98.25          | 3367.0       | 52797  | 37.11         | 104.03         | 1630.9       |
| 52643  | 38.50         | 99.37          | 2311.8       | 52884  | 36.21         | 103.57         | 1668.5       |
| 52645  | 38.26         | 99.36          | 3314.0       | 52885  | 36.45         | 103.15         | 2118.8       |
| 52656  | 38.28         | 100.49         | 2232.0       | 52889  | 36.03         | 103.53         | 1517.2       |
| 52657  | 38.11         | 100.15         | 2787.4       | 52895  | 36.34         | 104.41         | 1398.2       |
| 52679  | 37.55         | 102.40         | 1531.5       | 52896  | 36.33         | 104.09         | 1736.7       |
| 52713  | 37.51         | 95.21          | 3173.2       | 52980  | 35.58         | 103.18         | 1648.0       |
| 52737  | 37.22         | 97.23          | 2981.5       | 52981  | 35.41         | 103.23         | 2421.0       |
| 52745  | 37.18         | 99.01          | 3417.1       | 52982  | 35.29         | 103.33         | 1953.2       |
| 52754  | 37.20         | 100.08         | 3301.5       | 52983  | 35.52         | 104.09         | 1874.4       |
| 52765  | 37.23         | 101.37         | 2850.0       | 52984  | 35.35         | 103.11         | 1917.2       |
| 52784  | 37.28         | 102.54         | 2072.4       | 52986  | 35.22         | 103.52         | 1893.8       |
| 52787  | 37.12         | 102.52         | 3045.1       | 52993  | 35.41         | 105.04         | 1739.4       |
| 52818  | 36.25         | 94.55          | 2807.6       | 52995  | 35.35         | 104.37         | 1897.2       |
| 52825  | 36.26         | 96.26          | 2790.4       | 52996  | 35.23         | 105.01         | 2450.6       |
| 52836  | 36.18         | 98.06          | 3189.0       | 52998  | 35.08         | 104.12         | 2111.0       |
| 52842  | 36.47         | 99.05          | 3087.6       | 53908  | 35.13         | 105.14         | 1769.8       |
| 52855  | 36.41         | 101.15         | 2675.0       | 55655  | 28.11         | 85.58          | 3810.0       |
| 52856  | 36.16         | 100.37         | 2835.0       | 55690  | 27.59         | 91.57          | 4280.3       |
| 52862  | 36.57         | 101.41         | 2450.0       | 56091  | 34.51         | 104.28         | 1883.3       |
| 52863  | 36.49         | 101.57         | 2480.0       | 56092  | 35.00         | 104.39         | 1728.2       |
| 52866  | 36.44         | 101.45         | 2295.2       | 56093  | 34.26         | 104.01         | 2315.0       |
| 52868  | 36.01         | 101.22         | 2273.0       | 56095  | 34.02         | 104.23         | 1753.2       |
| 52869  | 36.30         | 101.35         | 2667.5       | 56096  | 33.24         | 104.55         | 1079.1       |
| 52874  | 36.29         | 102.25         | 2021.0       | 56181  | 30.41         | 103.42         | 541.7        |
| 52876  | 36.20         | 102.50         | 1813.9       | 56186  | 31.20         | 104.12         | 589.0        |
| 52877  | 36.06         | 102.15         | 2834.7       | 56187  | 30.45         | 103.52         | 547.7        |
| 52908  | 35.13         | 93.05          | 4612.2       | 56188  | 31.00         | 103.40         | 698.5        |
| 52943  | 35.35         | 99.59          | 3323.0       | 56189  | 30.59         | 103.56         | 581.7        |
| 52955  | 35.35         | 100.44         | 3120.0       | 56190  | 31.33         | 104.33         | 519.4        |
| 52957  | 35.15         | 100.36         | 3148.2       | 56192  | 32.57         | 104.40         | 1014.3       |
| 52963  | 35.56         | 102.01         | 2085.7       | 56193  | 32.25         | 104.31         | 893.2        |
| 52968  | 35.02         | 101.28         | 3662.8       | 56195  | 31.48         | 104.44         | 543.1        |
| 52972  | 35.51         | 102.27         | 1921.0       | 56196  | 31.27         | 104.44         | 522.7        |
| 52974  | 35.33         | 102.02         | 2475.0       | 56197  | 31.09         | 104.10         | 535.7        |
| 52978  | 35.11         | 102.30         | 2948.3       | 56198  | 31.19         | 104.30         | 525.7        |
| 52985  | 35.25         | 103.20         | 2162.8       | 56199  | 31.02         | 104.41         | 423.5        |

|       |       |        |        |       |       |        |        |
|-------|-------|--------|--------|-------|-------|--------|--------|
| 52988 | 35.22 | 103.43 | 2015.8 | 56272 | 30.49 | 103.53 | 558.5  |
| 55228 | 32.30 | 80.05  | 4278.6 | 56273 | 30.23 | 102.49 | 1022.0 |
| 55279 | 31.23 | 90.01  | 4700.0 | 56276 | 30.27 | 103.49 | 467.0  |
| 55294 | 32.21 | 91.06  | 4800.0 | 56278 | 30.04 | 102.47 | 755.8  |
| 55299 | 31.29 | 92.04  | 4507.0 | 56279 | 30.10 | 102.57 | 744.1  |
| 55472 | 30.57 | 88.38  | 4672.0 | 56280 | 30.05 | 103.07 | 691.3  |
| 55493 | 30.29 | 91.06  | 4200.0 | 56281 | 30.12 | 103.29 | 510.8  |
| 55578 | 29.15 | 88.53  | 3836.0 | 56284 | 30.27 | 103.26 | 518.5  |
| 55591 | 29.40 | 91.08  | 3648.9 | 56285 | 30.34 | 103.28 | 544.7  |
| 55598 | 29.16 | 91.46  | 3560.0 | 56287 | 29.59 | 103.00 | 627.6  |
| 55680 | 28.55 | 89.36  | 4040.0 | 56289 | 30.12 | 103.52 | 437.0  |
| 55681 | 28.58 | 90.24  | 4431.7 | 56290 | 30.47 | 104.11 | 514.5  |
| 55696 | 28.25 | 92.28  | 3860.0 | 56291 | 30.56 | 104.17 | 469.0  |
| 55773 | 27.44 | 89.05  | 4300.0 | 56295 | 30.23 | 104.33 | 448.5  |
| 56004 | 34.13 | 92.26  | 4533.1 | 56296 | 30.49 | 104.26 | 493.5  |
| 56016 | 33.51 | 95.37  | 4179.1 | 56297 | 30.01 | 104.09 | 436.5  |
| 56018 | 32.53 | 95.17  | 4066.4 | 56298 | 30.08 | 104.36 | 417.0  |
| 56021 | 34.07 | 95.48  | 4175.0 | 56371 | 29.53 | 102.13 | 1403.2 |
| 56029 | 33.00 | 96.58  | 3716.9 | 56373 | 29.47 | 102.51 | 797.5  |
| 56033 | 34.55 | 98.13  | 4272.3 | 56376 | 29.20 | 102.38 | 1098.0 |
| 56034 | 33.48 | 97.08  | 4415.4 | 56380 | 29.53 | 103.21 | 571.2  |
| 56038 | 32.59 | 98.06  | 4200.0 | 56381 | 30.04 | 103.31 | 630.2  |
| 56043 | 34.29 | 100.14 | 3719.0 | 56382 | 29.45 | 103.33 | 475.0  |
| 56046 | 33.45 | 99.39  | 3967.5 | 56383 | 29.50 | 103.52 | 455.2  |
| 56065 | 34.44 | 101.36 | 3500.0 | 56384 | 29.36 | 103.29 | 446.7  |
| 56067 | 33.26 | 101.29 | 3628.5 | 56385 | 29.31 | 103.20 | 3069.9 |
| 56074 | 34.00 | 102.05 | 3471.4 | 56386 | 29.34 | 103.45 | 424.2  |
| 56079 | 33.35 | 102.58 | 3441.4 | 56387 | 29.14 | 103.16 | 642.2  |
| 56080 | 35.00 | 102.54 | 2910.0 | 56389 | 29.12 | 103.57 | 387.6  |
| 56081 | 34.42 | 103.21 | 2810.2 | 56390 | 29.40 | 104.04 | 404.4  |
| 56097 | 33.16 | 104.15 | 1440.5 | 56394 | 29.27 | 104.26 | 384.1  |
| 56106 | 31.53 | 93.47  | 4022.8 | 56459 | 27.56 | 101.16 | 2426.5 |
| 56116 | 31.25 | 95.36  | 3873.1 | 56473 | 28.57 | 102.46 | 1060.3 |
| 56125 | 32.12 | 96.28  | 3643.7 | 56474 | 28.33 | 102.10 | 1774.0 |
| 56137 | 31.09 | 97.10  | 3315.0 | 56475 | 28.39 | 102.31 | 1659.5 |
| 56144 | 31.48 | 98.35  | 3184.0 | 56478 | 28.18 | 102.26 | 1818.1 |
| 56146 | 31.37 | 100.00 | 3393.5 | 56479 | 28.00 | 102.51 | 2132.4 |
| 56147 | 31.13 | 98.50  | 3260.0 | 56480 | 28.49 | 103.32 | 564.1  |
| 56151 | 32.56 | 100.45 | 3530.0 | 56483 | 28.35 | 103.57 | 496.6  |
| 56152 | 32.17 | 100.20 | 3893.9 | 56485 | 28.16 | 103.35 | 1255.8 |
| 56158 | 31.24 | 100.40 | 3250.0 | 56487 | 28.20 | 103.08 | 1943.9 |
| 56164 | 32.16 | 100.58 | 3292.9 | 56489 | 28.14 | 103.37 | 975.6  |
| 56167 | 30.59 | 101.07 | 2957.2 | 56490 | 28.57 | 103.54 | 424.0  |
| 56168 | 31.29 | 102.04 | 2168.9 | 56533 | 27.45 | 98.40  | 1583.3 |

|       |       |        |        |       |       |        |        |
|-------|-------|--------|--------|-------|-------|--------|--------|
| 56171 | 32.54 | 101.42 | 3275.1 | 56543 | 27.51 | 99.45  | 3341.5 |
| 56172 | 31.54 | 102.14 | 2664.4 | 56548 | 27.10 | 99.17  | 2326.1 |
| 56173 | 32.48 | 102.33 | 3491.6 | 56565 | 27.26 | 101.29 | 2516.8 |
| 56178 | 31.00 | 102.21 | 2438.0 | 56569 | 27.25 | 102.11 | 1380.0 |
| 56180 | 31.41 | 103.51 | 1590.1 | 56571 | 27.54 | 102.16 | 1590.9 |
| 56182 | 32.40 | 103.36 | 2881.3 | 56575 | 27.22 | 102.33 | 1530.7 |
| 56183 | 31.30 | 103.37 | 1370.1 | 56578 | 27.04 | 102.45 | 993.6  |
| 56185 | 32.05 | 102.59 | 2400.1 | 56580 | 27.43 | 102.48 | 2460.0 |
| 56202 | 30.40 | 93.17  | 4488.8 | 56584 | 27.42 | 103.15 | 1093.0 |
| 56227 | 29.52 | 95.46  | 2736.0 | 56641 | 26.54 | 98.52  | 1189.7 |
| 56247 | 30.00 | 99.06  | 2589.2 | 56645 | 26.25 | 99.25  | 2344.9 |
| 56251 | 30.56 | 100.19 | 3000.0 | 56649 | 26.06 | 99.58  | 2059.9 |
| 56263 | 30.53 | 101.53 | 1949.7 | 56651 | 26.51 | 100.13 | 2380.9 |
| 56267 | 30.02 | 101.01 | 2600.9 | 56652 | 26.41 | 100.45 | 2130.5 |
| 56312 | 29.40 | 94.20  | 2991.8 | 56654 | 26.35 | 100.11 | 2195.4 |
| 56357 | 29.03 | 100.18 | 3727.7 | 56664 | 26.38 | 101.16 | 1230.8 |
| 56374 | 30.03 | 101.58 | 2615.7 | 56665 | 26.41 | 101.51 | 1140.3 |
| 56378 | 29.14 | 102.21 | 890.7  | 56670 | 26.55 | 102.07 | 1136.9 |
| 56434 | 28.39 | 97.28  | 2327.6 | 56671 | 26.39 | 102.15 | 1787.3 |
| 56443 | 28.56 | 99.48  | 2842.0 | 56739 | 24.59 | 98.30  | 1695.9 |
| 56444 | 28.29 | 98.54  | 3319.0 | 56742 | 25.53 | 99.22  | 1723.9 |
| 56462 | 29.00 | 101.30 | 2925.0 | 56745 | 25.41 | 99.57  | 1626.1 |
| 56567 | 27.15 | 100.51 | 2367.2 | 56746 | 25.28 | 99.31  | 1616.7 |
| 51704 | 39.43 | 76.10  | 1298.7 | 56748 | 25.07 | 99.11  | 1652.2 |
| 51705 | 39.43 | 75.15  | 2175.7 | 56751 | 25.42 | 100.11 | 1977.7 |
| 51707 | 39.30 | 76.47  | 1204.7 | 56752 | 25.50 | 100.34 | 1438.7 |
| 51708 | 39.09 | 75.57  | 1325.1 | 56835 | 24.10 | 97.47  | 959.1  |
| 51709 | 39.29 | 75.45  | 1385.6 | 56836 | 24.42 | 97.57  | 826.7  |
| 51717 | 39.15 | 76.47  | 1206.3 | 56838 | 24.00 | 97.51  | 762.9  |
| 51777 | 39.02 | 88.10  | 887.7  | 56840 | 24.49 | 98.18  | 1012.9 |
| 51802 | 38.56 | 76.10  | 1297.5 | 56841 | 24.36 | 98.41  | 1528.0 |
| 51810 | 38.55 | 77.38  | 1178.2 | 56842 | 24.44 | 99.11  | 1471.2 |
| 51811 | 38.26 | 77.16  | 1231.2 | 56844 | 24.26 | 98.35  | 913.8  |
| 51814 | 37.55 | 77.24  | 1360.4 | 57001 | 34.45 | 105.2  | 1271.9 |
| 51815 | 38.12 | 77.16  | 1274.7 | 57002 | 34.51 | 105.39 | 1216.1 |
| 51818 | 37.37 | 78.17  | 1375.4 | 57004 | 34.44 | 104.53 | 1495.4 |
| 51826 | 37.01 | 80.48  | 1336.5 | 57006 | 34.34 | 105.45 | 1149.8 |
| 51827 | 37.10 | 79.38  | 1348.9 | 57007 | 34.11 | 105.11 | 1404.6 |
| 51828 | 37.08 | 79.56  | 1375.0 | 57008 | 34.02 | 105.18 | 1579.0 |
| 51829 | 37.03 | 80.14  | 1295.6 | 57014 | 34.34 | 105.52 | 1085.2 |
| 51839 | 37.04 | 82.43  | 1409.5 | 57102 | 33.45 | 105.43 | 970.0  |
| 51855 | 38.09 | 85.33  | 1247.2 | 57105 | 33.20 | 105.36 | 1221.2 |
| 51931 | 36.51 | 81.39  | 1422.0 | 57106 | 33.19 | 106.09 | 794.2  |
| 52418 | 40.09 | 94.41  | 1139.0 | 57110 | 33.47 | 106.05 | 930.8  |



|       |       |        |        |       |       |        |       |
|-------|-------|--------|--------|-------|-------|--------|-------|
| 52424 | 40.32 | 95.47  | 1170.9 | 57204 | 32.34 | 105.13 | 782.0 |
| 52436 | 40.16 | 97.02  | 1526.0 | 57206 | 32.25 | 105.54 | 545.4 |
| 52446 | 40.18 | 99.31  | 1177.4 | 57208 | 32.17 | 105.31 | 544.5 |
| 52447 | 40.00 | 98.53  | 1270.5 | 57304 | 31.40 | 105.10 | 516.5 |
| 52546 | 39.22 | 99.50  | 1332.2 | 57307 | 31.06 | 105.05 | 459.9 |
| 52557 | 39.09 | 100.10 | 1453.7 | 57308 | 31.13 | 105.23 | 421.3 |
| 52575 | 39.25 | 102.47 | 1239.5 | 57401 | 30.52 | 105.22 | 383.3 |
| 52576 | 39.13 | 101.41 | 1510.1 | 57407 | 30.17 | 105.02 | 462.6 |

Table S2. The performance of PenPan model for monthly  $E_{\text{pan}}$  at 274 stations in the QTP.

| Metrics        | Minima | Maxima | Mean $\pm$ 1s.d. | Station proportion |
|----------------|--------|--------|------------------|--------------------|
| Slope          | 0.72   | 0.99   | $0.92 \pm 0.05$  |                    |
| R <sup>2</sup> | 0.85   | 0.99   | $0.96 \pm 0.03$  | 100%               |
| MD (mm)        | -0.40  | 0.00   | $0.00 \pm 0.03$  | 0                  |
| RMSE (mm)      | 6.68   | 41.48  | $15.92 \pm 5.11$ |                    |

Table S3. Climate zones of China.

| No | Major Climate Zone         | Minor Climate Zone Code | Name                                  |
|----|----------------------------|-------------------------|---------------------------------------|
| 1  | I North Temperate Zone     | IA1                     | Genhe Zone                            |
| 2  | II Mid-temperate Zone      | <b>IIC5</b>             | <b>Yining Zone</b>                    |
|    |                            | IIC3                    | Fuyun Zone                            |
|    |                            | IIC4                    | Tacheng Zone                          |
|    |                            | IIC1                    | Mengdong Zone                         |
|    |                            | <b>IIC2</b>             | <b>Mengzhong Zone</b>                 |
|    |                            | IIA1                    | Xiaoxinganling Zone                   |
|    |                            | IIB1                    | Daxinganling Zone                     |
|    |                            | <b>IID1</b>             | <b>Menggan Zone</b>                   |
|    |                            | IID2                    | Beijiang Zone                         |
|    |                            | IIA2                    | Sanjiang-Changbai Zone                |
|    |                            | IIB2                    | Songliao Zone                         |
| 3  | III South Temperate Zone   | <b>IID1</b>             | <b>Nanjiang Zone</b>                  |
|    |                            | IIC1                    | Jinshangan Zone                       |
|    |                            | IIIB1                   | Hebei Zone                            |
|    |                            | <b>IIIB3</b>            | <b>Weihe Zone</b>                     |
|    |                            | IIIA1                   | Liaodong-Jiaodongbandao Zone          |
|    |                            | IIIB2                   | Lvhuai Zone                           |
| 4  | IV North Subtropical Zone  | <b>IVA2</b>             | <b>Qinba Zone</b>                     |
|    |                            | IVA1                    | Jiangbei Zone                         |
| 5  | V Mid-subtropical Zone     | VA2                     | Oujiang, Minjiang, Nanling Zone       |
|    |                            | <b>VA1</b>              | <b>Jiangnan Zone</b>                  |
|    |                            | <b>VA3</b>              | <b>Sichuan Zone</b>                   |
|    |                            | VA4                     | Guizhou zone                          |
|    |                            | <b>VB1</b>              | <b>Jinshajiang-Chuxiong-Yuxi Zone</b> |
|    |                            | <b>VA5</b>              | <b>Dianbei Zone</b>                   |
| 6  | VI South Subtropical Zone  | VIA1                    | Taibei Zone                           |
|    |                            | VIA2                    | Minnan-Zhujiang Zone                  |
|    |                            | <b>VIA3</b>             | <b>Diannan Zone</b>                   |
| 7  | VII North Subtropical Zone | VIIA2                   | Leiqiong Zone                         |
|    |                            | VIIA1                   | Tainan Zone                           |
|    |                            | VIIB1                   | Qiongxi Zone                          |
|    |                            | VIIA3                   | Diannanhegu Zone                      |
|    |                            | VIIC1                   | Yuanjiang Zone                        |
|    |                            | VIIA1                   | Tainan Zone                           |
| 8  | VIII Mid-tropical Zone     | VIIIA1                  | Qiongnan-Xisha Zone                   |
| 9  | IX South Tropical Zone     | IXA1                    | Nansha Zone                           |
| 10 | H Highland Climate         | <b>HD2</b>              | <b>Zangbei Zone</b>                   |

|      |                  |                              |
|------|------------------|------------------------------|
| Zone | <b>HC3</b>       | <b>Zangnan Zone</b>          |
|      | <b>HC2</b>       | <b>Zangzhong Zone</b>        |
|      | <b>HB2</b>       | <b>Changdu Zone</b>          |
|      | HA1              | Bomi-Chuanxi Zone            |
|      | <b>HVVIVIIA1</b> | <b>Dawang-Chayu Zone</b>     |
|      | <b>HC1</b>       | <b>Qilian-Qinghaihu Zone</b> |
|      | HB1              | Qingnan Zone                 |
|      | <b>HD1</b>       | <b>Chaidamu zone</b>         |

Note: Climate zones used in this study were in bold.
